# Supplementary material for: A Fully Integrated and Miniaturized Heavy-metal-detection Sensor Based on Micro-patterned Reduced Graphene Oxide
Source: PubMed Central journal article supplement (PMC5018876; doi:10.1038/srep33125), 2016-09-12
Supplement: srep33125-s1.pdf [file srep33125-s1.pdf]

# **A Fully Integrated and Miniaturized Heavy-metal-detection Sensor Based on Micro-patterned Reduced Graphene Oxide**

**Xing Xuan, Md. Faruk Hossain, Jae Yeong Park\***

## **Supplementary Data**

Department of Electronic Engineering, Micro/Nano Devices & Packaging Lab., Kwangwoon University,  
447-1, Wolgye-Dong, Nowon Gu, Seoul, 139-701, Korea

---

\* Corresponding author. Tel.: +82-2-940-5113; fax: +82-2-942-1502;  
e-mail: [jaepark@kw.ac.kr](mailto:jaepark@kw.ac.kr)

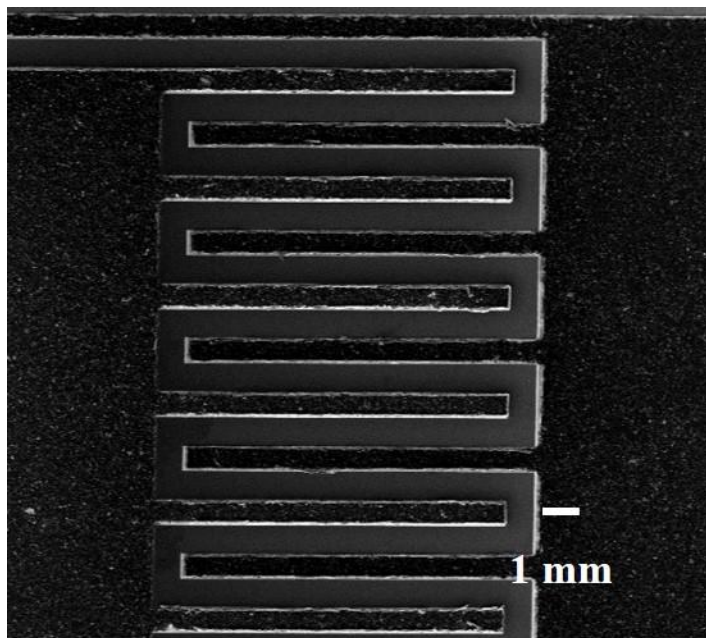

Figure S1. Top view of FE-SEM image of micro-patterned TRGO with an interdigital shape.

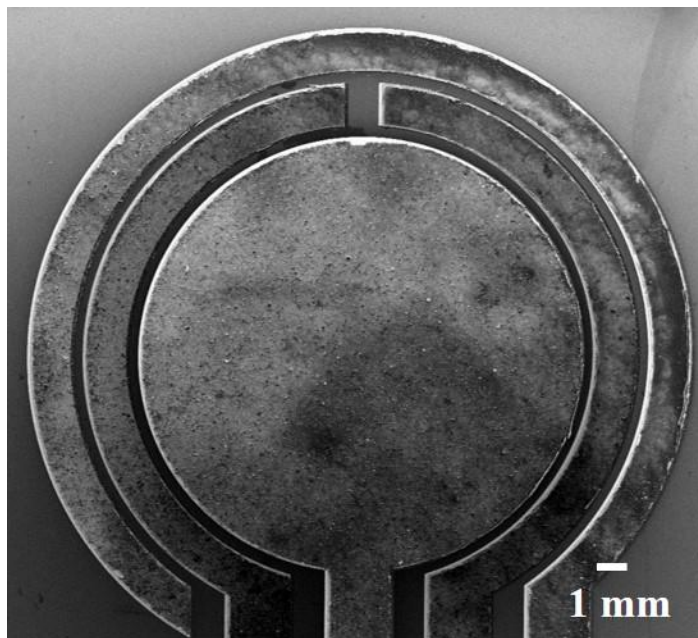

Figure S2. Top view of FE-SEM image of micro-patterned TRGO with a disk shape.

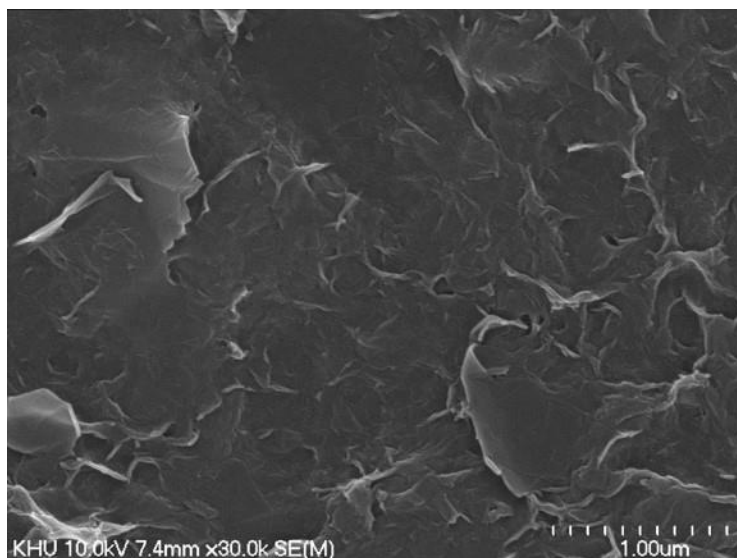

Figure S3. The FE-SEM image of the after patterning TRGO/Au electrode.

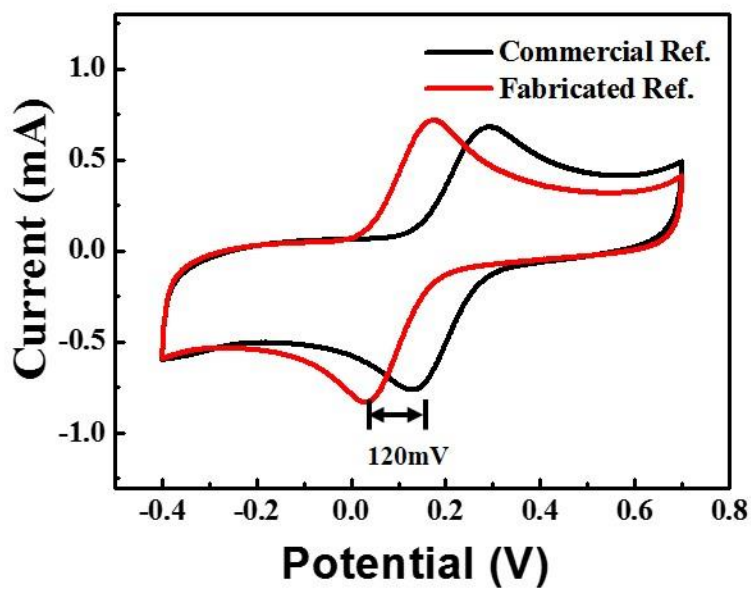

Figure S4. CV curves of fabricated reference electrode and commercial Ag/AgCl (3M NaCl) electrode in 0.1 M KCl solution containing 5 mM  $[\text{Fe}(\text{CN})_6]^{3-/4-}$ .

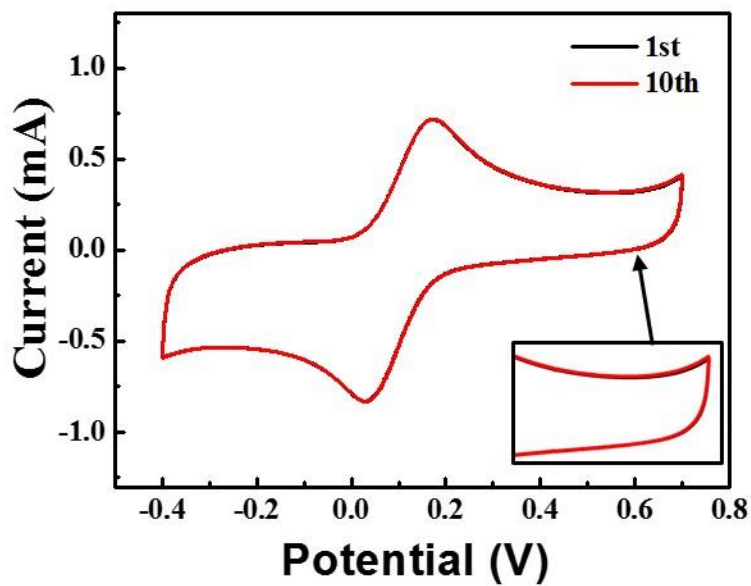

Figure S5. The stability of fabricated sensor with screen printed reference electrode.

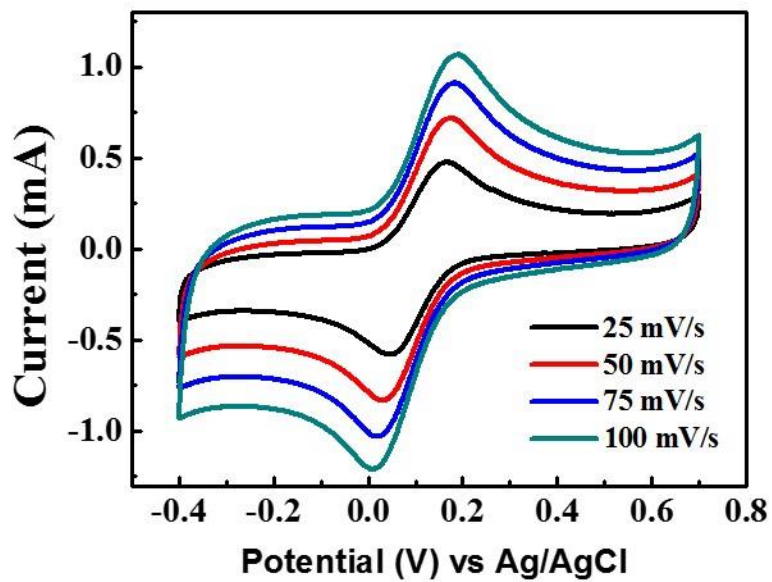

Figure S6. The CV curves of working electrode in 0.1 M KCl containing 5 mM  $[\text{Fe}(\text{CN})_6]^{3-/4-}$  at 25, 50, 75 and 100 mV/s scan rates .

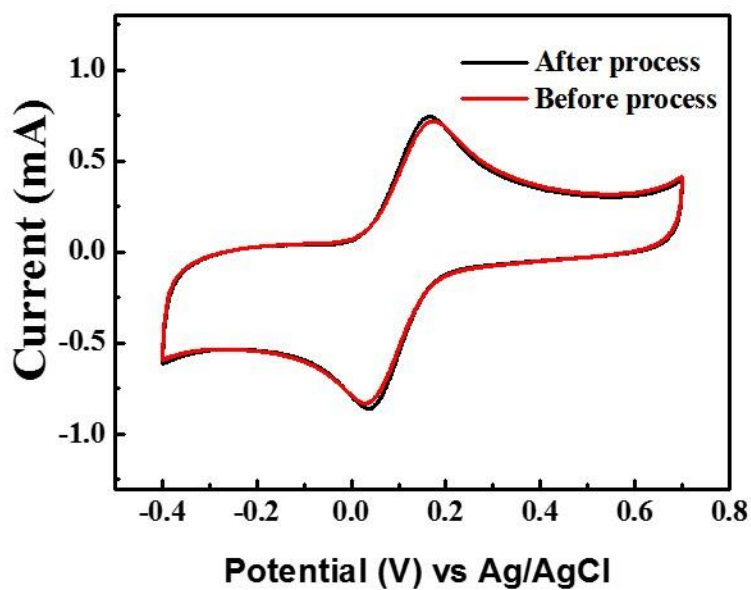

Figure S7. The TRGO/Au electrodes CV curves for solution containing 5 mM  $[\text{Fe}(\text{CN})_6]^{3-/4-}$  in 0.1 M KCl, (red line) before and (black line) after patterning process (Scan rate of 50 mV/s).

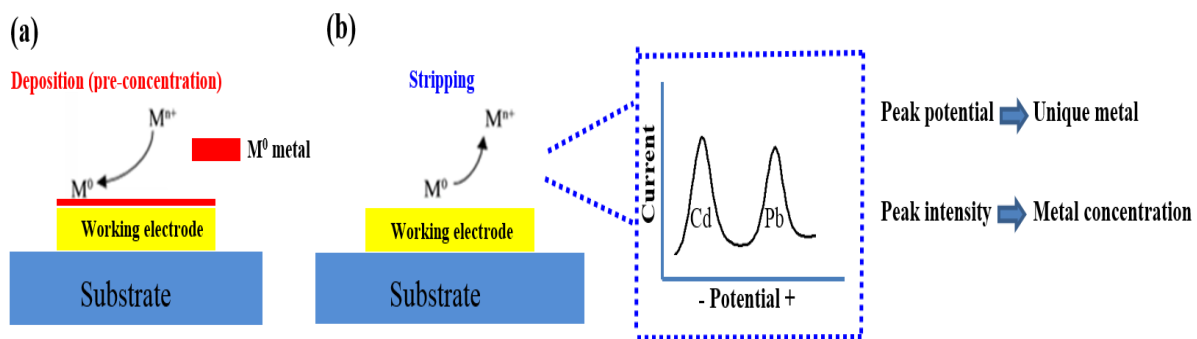

Figure S8. The heavy metal ions sensing principle using SWASV.
